# Supplementary material for: PTPN21 Overexpression Promotes Osteogenic and Adipogenic Differentiation of Bone Marrow-Derived Mesenchymal Stem Cells but Inhibits the Immunosuppressive Function
Source: Hindawi journal article supplement (doi:10.1155/2019/4686132), 2019-11-21
Supplement: f1 [file 4686132.f1.zip]

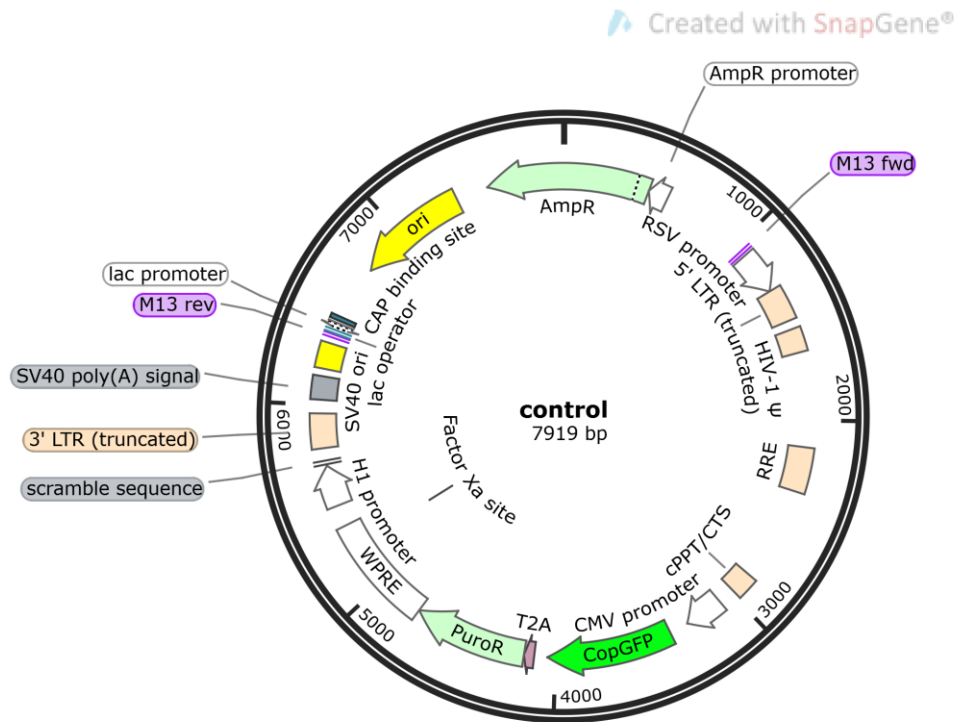

Figure 1. Lentiviral control plasmid

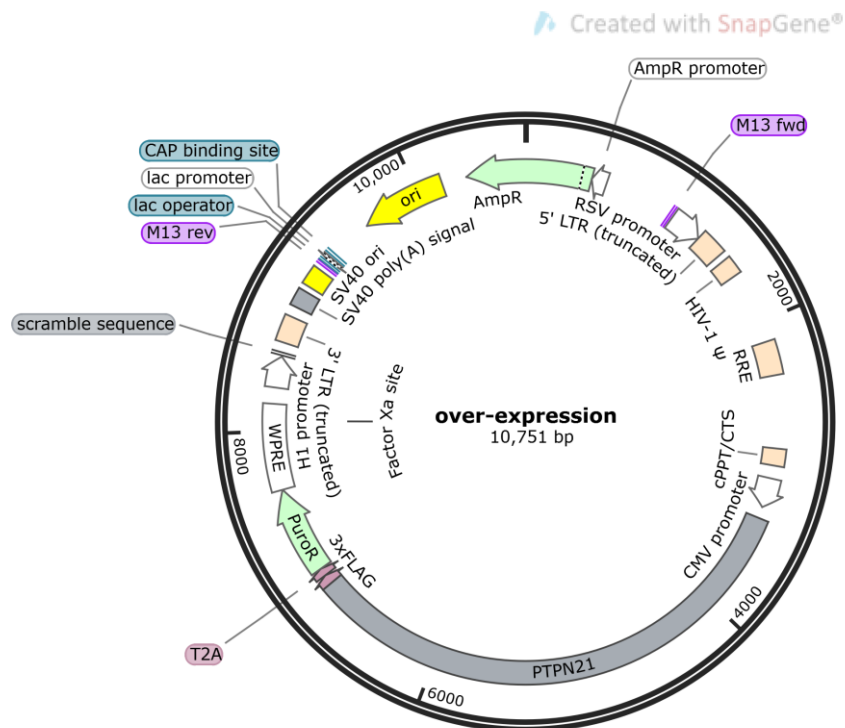

Figure 2. Lentiviral PTPN21 overexpression plasmid

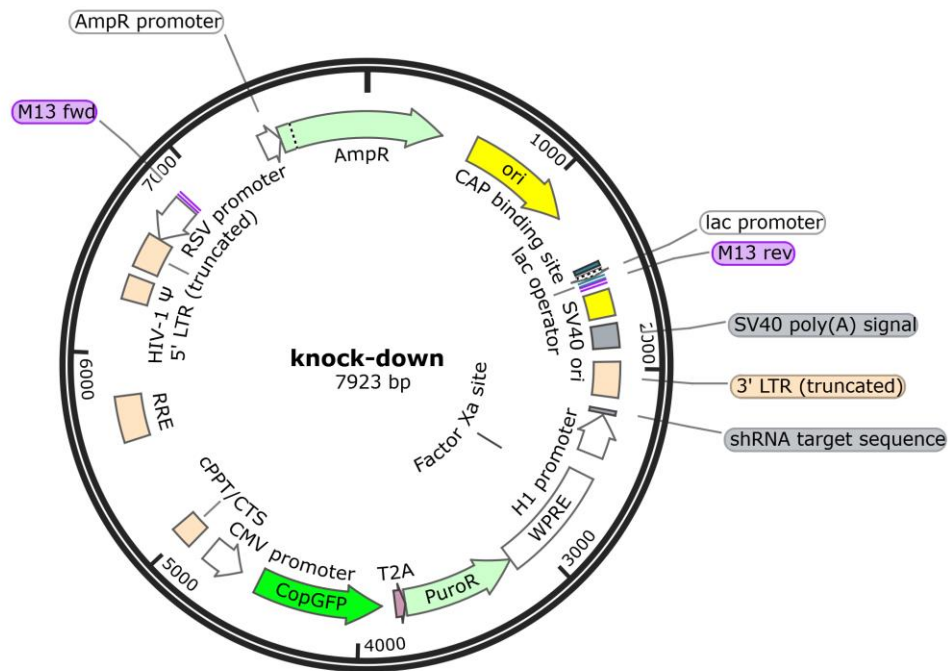

Figure 3. Lentiviral PTPN21 knock-down plasmid
